# Supplementary material
Source: ML conference proceedings conference paper supplement (https://openreview.net/forum?id=Cf4FJGmHRQ)
Supplement: supplementary_material [file attachment]

## APPENDIX

## A VARIOUS RESOLUTION IMAGES

There are no image datasets prepared for various resolutions. Therefore, creating images in various resolutions through an appropriate resizing method is important in our task. Chrabaszcz et al. (2017) showed that low-resolution images resized by some interpolations have the characteristics of the original image. Among various interpolation methods, the bilinear interpolation method retains the most characteristics of the original images. Therefore, we constructed low-resolution image datasets applying the same bilinear interpolation method to the original dataset.

After constructing the low-resolution datasets, we examined the performance decrease with various pre-trained models. To check the performance decrease, the low-resolution images were resized back to the target resolution (224) with various interpolation methods. Table 5 shows that the bicubic interpolation has the smallest performance decrease. As mentioned in Section 1, images resized by the bicubic interpolation were used as input to various pre-trained models.

Table 5: The top-1 accuracy of pre-trained ConvNeXt-Tiny in various resolutions when resized up with each interpolating method.

| Method        | Acc. (%) | Resolution   |              |              |              |
|---------------|----------|--------------|--------------|--------------|--------------|
|               |          | 32           | 64           | 128          | <b>224</b>   |
| Nearest       | Top-1    | 0.9          | 18.17        | 58.27        | <b>82.52</b> |
| Bilinear      | Top-1    | 29.47        | 60.36        | 76.98        | <b>82.52</b> |
| Bicubic       | Top-1    | <b>34.51</b> | <b>64.88</b> | <b>77.27</b> | <b>82.52</b> |
| Area          | Top-1    | 0.9          | 34.92        | 74.42        | <b>82.52</b> |
| Nearest-exact | Top-1    | 0.9          | 18.27        | 58.27        | <b>82.52</b> |

Table 6: Classification accuracy drops when scaling up low-resolution images, *i.e.*, 32, 64, 128, to target resolution, *i.e.*, 224 or 299, using existing image interpolation methods. We report the best interpolation method’s results.

| Model         | Acc. (%) | Resolution |       |       |            |            | # Param. |
|---------------|----------|------------|-------|-------|------------|------------|----------|
|               |          | 32         | 64    | 128   | <b>224</b> | <b>299</b> |          |
| ResNet-18     | Top-1    | 22.09      | 50.53 | 65.52 | 69.76      | -          | 11.69M   |
|               | Relative | 31.67      | 72.43 | 93.91 | 100        | -          |          |
| Inception-V3  | Top-1    | 22.05      | 53.92 | 71.77 | -          | 77.29      | 27.16M   |
|               | Relative | 33.69      | 72.39 | 93.51 | -          | 100        |          |
| ViT-B16       | Top-1    | 47.39      | 68.91 | 78.13 | 81.07      | -          | 86.57M   |
|               | Relative | 58.46      | 85.00 | 69.37 | 100        | -          |          |
| ConvNeXt-Tiny | Top-1    | 34.51      | 64.88 | 77.27 | 82.52      | -          | 28.59M   |
|               | Relative | 42.02      | 79.00 | 94.08 | 100        | -          |          |

## B DETAILED DESCRIPTION OF DATASETS

The following are detailed descriptions of the datasets used in our experiments. The number of classes, train images, and test images are organized in Table 7.

## B.1 IMAGENET-1K

ImageNet-1k (Russakovsky et al., 2015) is the most widely used dataset in image classification along with iNaturalist. In particular, the most widely used dataset, ImageNet Large Scale Visual Recognition Challenge 2012 (ILSVRC2012), contains 1000 categories of 1.2 million images. ImageNet is built with the WordNet hierarchy which means each category is explained by several words or phrases. Thus, its goal is to offer a set of qualified images in the same hierarchical words or phrases.

## B.2 FINE-GRAINED DATASETS

Fine-grained Datasets contain classes from a single category, such as cars, birds, flowers, aircraft, or food, and these are more difficult to classify where detailed elements must be considered.

**Stanford Cars** Stanford Cars (Krause et al., 2013) is a dataset containing car images. There are 196 classes with information on make, model, and year (*e.g.*, 2012 BMW M3 coupe).

**Oxford-IIIT Pets** Oxford-IIIT Pets (Parkhi et al., 2012) contains images of cats and dogs with 37 categories. The label consisted of species and breeds. This dataset also provides a bounding box for segmentation tasks.

**Flowers** Flowers (Nilsback & Zisserman, 2008) includes 102 categories of flowers that are mainly found in the United Kingdom. Even flowers belonging to the same categories have large variations in pose, size, and light.

**FGVC Aircraft** FGVC Aircraft (Maji et al., 2013) is used in the fine-grained recognition challenge 2013 (FGComp). Aircraft with various sizes, purposes, driving forces, and other features are classified by those fine-grained features. The 100 categories of aircraft include the make or name of the model series.

**Food-101** Food-101 (Bossard et al., 2014) contains 101 kinds of food images, which were originally provided to be used for RandomForest. The number of images is much larger compared to other fine-grained datasets. The images in this dataset are already rescaled and contain noises ranging from color intensity to wrong labels.

Table 7: The number of classes, train images and test images.

| Datasets         | # of classes | # of train images | # of test images |
|------------------|--------------|-------------------|------------------|
| ImageNet-1k      | 1000         | 1,281,167         | 50,000           |
| Stanford Cars    | 196          | 8,144             | 8,041            |
| Oxford-IIIT Pets | 37           | 3,680             | 3,669            |
| Flowers          | 102          | 1,020             | 6,149            |
| FGVC Aircraft    | 100          | 3,334             | 3,333            |
| Food-101         | 101          | 75,750            | 25,250           |

## C TRAINING ALGORITHM

We describe a two-stage training algorithm in Algorithm. 1. We first stage for training with target resolution in the first while loop, followed by the second while loop for training with various resolutions.

---

**Algorithm 1:** 2-stage Training of PAC-FNO

---

**Input:** Target resolution data  $D_{target}$ , Number of low-resolutions  $N$ , Low resolution data  $\{D_{low_1}, \dots, D_{low_N}\}$ , Class label  $y$ , Predicted class label  $\hat{y}$ , First phase iteration number  $K_{first}$ , Second phase iteration number  $K_{second}$ , PAC-FNO parameters  $\theta_o$ , Pre-trained backbone model parameters  $\theta_p$ , cross-entropy loss  $CE$

Initialize  $\theta_o$ ;  
 $k \leftarrow 0$ ;  
 /\* First training stage \*/  
**while**  $k < K_{first}$  **do**  
   **for** each mini-batch  $B \subseteq D_{target}$  **do**  
      $\{\hat{y}_i\}_{i=1}^{|B|} \leftarrow \text{Backbone}(\text{PAC-FNO}(B; \theta_o); \theta_p)$ ;  
     Train  $\theta_o$  and  $\theta_p$  with  $CE(\{\hat{y}_i\}_{i=1}^{|B|}, \{y_i\}_{i=1}^{|B|})$ ;  
      $k \leftarrow k + 1$ ;  
**end**  
 $k \leftarrow 0$ ;  
 /\* Second training stage \*/  
**while**  $k < K_{second}$  **do**  
   **for**  $i \leftarrow 1$  to  $N$  **do**  
     **for** each mini-batch  $B \subseteq D_{low_i}$  **do**  
        $\{\hat{y}_i\}_{i=1}^{|B|} \leftarrow \text{Backbone}(\text{PAC-FNO}(B; \theta_o); \theta_p)$ ;  
       Train  $\theta_o$  with  $CE(\{\hat{y}_i\}_{i=1}^{|B|}, \{y_i\}_{i=1}^{|B|})$ ;  
     **for** each mini-batch  $B \subseteq D_{target}$  **do**  
        $\{\hat{y}_i\}_{i=1}^{|B|} \leftarrow \text{Backbone}(\text{PAC-FNO}(B; \theta_o); \theta_p)$ ;  
       Train  $\theta_o$  with  $CE(\{\hat{y}_i\}_{i=1}^{|B|}, \{y_i\}_{i=1}^{|B|})$ ;  
      $k \leftarrow k + 1$ ;  
**end**

---

## D BACKBONE MODELS

We propose a plug-in module for multi-scale classification. Therefore, we applied various pre-trained classification models from CNN-based to ViT-based classification models. All classification models were trained with ImageNet-1k from scratch with the settings in Table 8. TORCHVISION provides all such pre-trained models.

**ResNet-18** Residual network (ResNet) is a model that applies the concept of residual connection to CNN architectures. ResNet-18 (He et al., 2016) consists of 18 convolutional blocks and 8 residual layers. It is the most fundamental model in image classification.

Table 8: Recipe for the pre-trained models provided in TORCHVISION.

| Model               | ResNet-18 | ViT-B16           | ConvNeXt-Tiny     |
|---------------------|-----------|-------------------|-------------------|
| Epochs              | 90        | 300               | 600               |
| Batch size          | 32        | 512               | 128               |
| Optimizer           | sgd       | adamw             | adamw             |
| Learning rate (lr.) | 0.1       | 3e-3              | 1e-3              |
| Weight decay        | 1e-4      | 0.3               | 0.05              |
| lr. scheduler       | steplr    | cosineannealinglr | cosineannealinglr |
| lr. warmup method   | -         | linear            | linear            |
| lr. warmup epochs   | -         | 30                | 5                 |
| lr. warmup decay    | -         | 0.033             | 0.01              |
| Amp                 | -         | ○                 | -                 |
| Random erase        | -         | -                 | 0.1               |
| Label smoothing     | -         | 0.11              | 0.1               |
| Mixup alpha         | -         | 0.2               | 0.2               |
| Auto augment        | -         | ra                | ta wide           |
| Clip grad norm      | -         | 1                 | -                 |
| Ra sampler          | -         | ○                 | ○                 |
| Cutmix alpha        | -         | 1.0               | 1.0               |
| Model-ema           | -         | ○                 | ○                 |
| Norm weight decay   | -         | -                 | 0.0               |
| Train crop size     | 224       | 224               | 176               |
| Test resize size    | 256       | 256               | 232               |
| Test crop size      | 224       | 224               | 224               |
| Ra reps             | -         | 3                 | 4                 |

**Inception-V3** Inception networks (Szegedy et al., 2016) are one of the most popular classification models, which stacks deep convolutional layers in an efficient way. They proposed techniques such as the concatenation of convolutional layers with different kernel sizes, kernel decomposition, and backpropagation with an auxiliary classifier for efficient training. We used the pre-trained Inception-V3 model provided by TORCHVISION, and there is no training recipe for training from scratch.

**ViT-B16** Vision Transformer (Dosovitskiy et al., 2020) (ViT) is a model that uses transformers based on a self-attention architecture in the image domain. It divides an image into patches and calculates all patch-by-patch relationships through self-attention. Because of these calculations, much memory and training time are required. Among those ViT-based models, ViT-B16 has the smallest model size and divides an image into 16 patches.

**ConvNeXt-Tiny** ConvNeXt (Liu et al., 2022) is one of the most recent models with good performance using only convolutional networks. It shows better performance with fewer parameters compared to ViT. To achieve good performance, it utilizes several advanced training schemes for convolutional networks. ConvNeXt-Tiny refers to the smallest model size in the ConvNeXt family.

## E HYPERPARAMETERS

In Tables 9 and 10, we list all the key hyperparameters in our experiments for each dataset. Our Appendix accompanies some trained checkpoints and one can easily reproduce.

Table 9: The best hyperparameter of our main experiments (ImageNet-1k).

| ImageNet-1k                         | ResNet-18 | Inception-V3 | Vision Transformer | ConvNeXt-Tiny |
|-------------------------------------|-----------|--------------|--------------------|---------------|
| # of parallel AC-FNO blocks ( $m$ ) | 2         | 2            | 2                  | 4             |
| # of stages ( $n$ )                 | 1         | 1            | 1                  | 2             |
| First phase training lr.            | 1e-3      | 1e-3         | 1e-3               | 2e-4          |
| Second phase training lr.           | 1e-6      | 1e-6         | 1e-6               | 2e-6          |

Table 10: The best hyperparameter of our experiments on the fine-grained datasets.

| ConvNeXt-Tiny                       | StanfordCars | Oxford-IIIT | Pets | Flowers | FGVC | Aircraft | Food-101 |
|-------------------------------------|--------------|-------------|------|---------|------|----------|----------|
| # of parallel AC-FNO blocks ( $m$ ) | 4            | 2           | 2    | 2       | 2    | 2        | 2        |
| # of stages ( $n$ )                 | 2            | 2           | 1    | 1       | 1    | 1        | 1        |
| First phase training lr.            | 1e-3         | 1e-3        | 1e-3 | 1e-3    | 1e-3 | 1e-3     | 1e-3     |
| Second phase training lr.           | 1e-6         | 1e-5        | 1e-6 | 1e-6    | 1e-6 | 1e-6     | 1e-6     |

## F EVALUATION

### F.1 EXPERIMENTAL SETUP

We run our experiments on a machine equipped with Intel i9 CPUs and Nvidia RTX A5000/A6000 GPUs. We implement PAC-FNO using Python v3.8 and PyTorch v1.12.

### F.2 NUMBER OF PARAMETERS OF PAC-FNO

We report the number of parameters of PAC-FNO according to backbone models and datasets.

Table 11: The number of parameters according to backbone models. Table 12: The number of parameters according to datasets

| ImageNet-1k             | ResNet-18 | Inception-V3 | Vision Transformer | ConvNeXt-Tiny | ConvNeXt-Tiny           | StanfordCars | Oxford-IIIT | Pets   | Flowers | FGVC   | Aircraft | Food-101 |
|-------------------------|-----------|--------------|--------------------|---------------|-------------------------|--------------|-------------|--------|---------|--------|----------|----------|
| # of PAC-FNO parameters | +0.91M    | +1.61M       | +0.91M             | +3.65M        | # of PAC-FNO parameters | +3.65M       | +3.65M      | +3.65M | +3.65M  | +3.65M | +3.65M   | +3.65M   |

### F.3 ADDITIONAL SUPER-RESOLUTION METHODS

In this section, we report experimental results with the additional latest super-resolution baseline. We fine-tune a pre-trained classification model with low-resolution images that are upsampled by the super-resolution model. We note that we used the latest super-resolution model.

In Table 13, combining the super-resolution and fine-tune methods shows better performance than simply upscaling low-resolution images to the target resolution using the super-resolution model. Even at 32 resolution, it shows slightly better performance than PAC-FNO. However, this super-resolution method has two major drawbacks. The first drawback is the model size. DRPN’s  $\times 8$  upscaling model has a similar number of parameters the pre-trained model size, i.e., 23.21M vs. 28.59M. Second, a model is needed for each resolution. In other words, upscaling models for  $\times 8$ ,  $\times 4$ , and  $\times 2$  are needed to handle 28, 56, and 112 resolutions, respectively. In contrast, our proposed PAC-FNO can handle images of all resolutions with an additional 3.65M network and shows good performance.

Additionally, we verify the superiority of PAC-FNO by providing a comparison with a method equipped with the latest super-resolution model. OSRT (Yu et al., 2023) is a state-of-the-art model in the super-resolution domain but it does not support  $\times 8$  upscale. Therefore, we only use the  $\times 2$  and  $\times 4$  upscale models of OSRT. As a result, PAC-FNO shows better performance than OSRT and OSRT (fine-tune) methods.

Table 13: **Results with the additional latest super-resolution method.** For the experiment, we used ConvNeXt-Tiny as a pre-trained model. (Left: ImageNet-1k, Right: ImageNet-C/P Fog)

| Model         | Method                          | Metric              | Resolution |       |       |       |       |      |      |
|---------------|---------------------------------|---------------------|------------|-------|-------|-------|-------|------|------|
|               |                                 |                     | 28         | 32    | 56    | 64    | 112   | 128  | 224  |
| ConvNeXt-Tiny | Resize                          | Top1-Acc (%)        | 27.5       | 34.5  | 60.7  | 64.9  | 75.0  | 77.3 | 82.5 |
|               | Fine-tune                       | Top1-Acc (%)        | 40.2       | 62.3  | 65.8  | 76.0  | 76.4  | 80.7 | 81.8 |
|               | DRPN                            | Top1-Acc (%)        | 40.7       | -     | 68.2  | -     | 79.4  | -    | 82.5 |
|               | DRPN                            | # of Parameters (M) | 23.21      | -     | 10.43 | -     | 5.95  | -    | -    |
|               | DRPN                            | Top1-Acc (%)        | 60.8       | -     | 72.5  | -     | 76.7  | -    | 82.5 |
|               | (Fine-tune) # of Parameters (M) | 23.21               | -          | 10.43 | -     | 5.95  | -     | -    | -    |
|               | OSRT                            | Top1-Acc (%)        | -          | -     | 61.4  | -     | 75.4  | -    | 82.5 |
|               | OSRT                            | # of Parameters (M) | -          | -     | 11.93 | -     | 11.79 | -    | -    |
|               | OSRT                            | Top1-Acc (%)        | -          | -     | 71.2  | -     | 78.4  | -    | 81.2 |
|               | (Fine-tune) # of Parameters (M) | -                   | -          | 11.93 | -     | 11.79 | -     | -    | -    |
| ConvNeXt-Tiny | PAC-FNO                         | Top1-Acc (%)        | 58.9       | 63.2  | 77.6  | 76.2  | 80.2  | 80.7 | 81.8 |
|               | PAC-FNO                         | # of Parameters (M) | -          | -     | 3.65  | -     | -     | -    | -    |
|               | Resize                          | Top1-Acc (%)        | 8.12       | 10.8  | 27.2  | 31.9  | 48.5  | 52.3 | 58.4 |
|               | Fine-tune                       | Top1-Acc (%)        | 23.2       | 28.2  | 47.5  | 51.4  | 61.0  | 62.2 | 63.0 |
|               | DRPN                            | Top1-Acc (%)        | 0.67       | -     | 0.99  | -     | 1.32  | -    | 58.4 |
|               | DRPN                            | # of Parameters (M) | 23.21      | -     | 10.43 | -     | 5.95  | -    | -    |
|               | DRPN                            | Top1-Acc (%)        | 21.8       | -     | 42.3  | -     | 56.8  | -    | 61.0 |
|               | (Fine-tune) # of Parameters (M) | 23.21               | -          | 10.43 | -     | 5.95  | -     | -    | -    |
|               | OSRT                            | Top1-Acc (%)        | -          | -     | 19.4  | -     | 37.9  | -    | 58.4 |
|               | OSRT                            | # of Parameters (M) | -          | -     | 11.93 | -     | 11.79 | -    | -    |
| ConvNeXt-Tiny | OSRT                            | Top1-Acc (%)        | -          | -     | 42.3  | -     | 56.4  | -    | 59.4 |
|               | (Fine-tune) # of Parameters (M) | -                   | -          | 11.93 | -     | 11.79 | -     | -    | -    |
|               | PAC-FNO                         | Top1-Acc (%)        | 25.4       | 30.4  | 48.2  | 51.7  | 60.1  | 61.4 | 62.8 |
|               | PAC-FNO                         | # of Parameters (M) | -          | -     | 3.65  | -     | -     | -    | -    |

## F.4 ADDITIONAL FINE-GRAINED DATASETS

Tables 14 and 15 show the performance of the remaining fine-grained dataset, Stanford Cars. PAC-FNO shows good performance in most cases, especially at low-resolution compared to other models. Tables 16 and 17 show the performance of the Oxford-IIIT Pets with the ViT model. PAC-FNO shows good performance than FNO at all resolutions.

Table 14: Top-1 accuracy on low-resolution.

| Dataset       | Method    | Resolution  |             |             |             |             |             |             |
|---------------|-----------|-------------|-------------|-------------|-------------|-------------|-------------|-------------|
|               |           | 28          | 32          | 56          | 64          | 112         | 128         | 224         |
| Stanford Cars | Resize    | 14.7        | 22.5        | 66.3        | 73.6        | 88.2        | 89.6        | 91.5        |
|               | Fine-tune | 12.3        | 66.5        | 70.5        | 88.5        | 91.2        | 92.4        | 92.6        |
|               | DRLN      | 1.98        | -           | 36.1        | -           | 87.0        | -           | 91.5        |
|               | DRPN      | 41.5        | -           | 84.2        | -           | 90.9        | -           | 91.5        |
|               | FNO       | 11.9        | 19.2        | 67.8        | 75.3        | 91.0        | 92.6        | <b>93.9</b> |
|               | UNO       | 57.4        | 66.2        | 85.9        | 87.8        | 91.6        | 92.1        | 92.3        |
|               | A-FNO     | 67.6        | 74.4        | 88.0        | 89.7        | 92.1        | 92.3        | 92.7        |
|               | PAC-FNO   | <b>70.4</b> | <b>76.6</b> | <b>89.0</b> | <b>90.0</b> | <b>92.6</b> | <b>92.8</b> | 93.5        |

Table 15: Relative accuracy on low-resolution.

| Dataset       | Method    | Resolution  |             |             |             |             |             |     |
|---------------|-----------|-------------|-------------|-------------|-------------|-------------|-------------|-----|
|               |           | 28          | 32          | 56          | 64          | 112         | 128         | 224 |
| Stanford Cars | Resize    | 16.1        | 24.5        | 72.4        | 80.4        | 96.4        | 97.9        | 100 |
|               | Fine-tune | 13.6        | 71.9        | 76.1        | 95.6        | 98.5        | <b>99.8</b> | 100 |
|               | DRLN      | 2.16        | -           | 39.4        | -           | 95.1        | -           | 100 |
|               | DRPN      | 51.9        | -           | 92.1        | -           | 99.3        | -           | 100 |
|               | FNO       | 12.7        | 20.5        | 72.2        | 80.2        | 96.9        | 98.6        | 100 |
|               | UNO       | 62.2        | 71.7        | 93.1        | 95.1        | 99.2        | <b>99.8</b> | 100 |
|               | A-FNO     | 72.9        | 80.2        | 94.9        | <b>96.7</b> | <b>99.4</b> | 99.5        | 100 |
|               | PAC-FNO   | <b>75.3</b> | <b>81.9</b> | <b>95.2</b> | 96.3        | 99.0        | 99.3        | 100 |

Table 16: Top-1 accuracy on low-resolution.

| Dataset          | Method  | Resolution  |             |             |             |             |             |             |
|------------------|---------|-------------|-------------|-------------|-------------|-------------|-------------|-------------|
|                  |         | 28          | 32          | 56          | 64          | 112         | 128         | 224         |
| Oxford-IIIT Pets | FNO     | 26.3        | 33.0        | 58.1        | 64.8        | 82.9        | 85.8        | 91.3        |
|                  | PAC-FNO | <b>40.3</b> | <b>46.2</b> | <b>69.0</b> | <b>72.5</b> | <b>86.8</b> | <b>89.2</b> | <b>92.2</b> |

Table 17: Relative accuracy on low-resolution.

| Model            | Method  | Resolution  |             |             |             |             |             |            |
|------------------|---------|-------------|-------------|-------------|-------------|-------------|-------------|------------|
|                  |         | 28          | 32          | 56          | 64          | 112         | 128         | 224        |
| Oxford-IIIT Pets | FNO     | 28.8        | 36.1        | 63.6        | 71.0        | 90.8        | 94.0        | 100        |
|                  | PAC-FNO | <b>43.7</b> | <b>50.1</b> | <b>74.8</b> | <b>78.6</b> | <b>94.1</b> | <b>96.7</b> | <b>100</b> |

## F.5 ADDITIONAL METRIC FOR IMAGENET-1K AND FINE-GRAINED DATASETS

Table 18 and 19 show the relative accuracy of low-resolution images generated by ImageNet-1k and fine-grained datasets. In ImageNet-1k, the performance of PAC-FNO is the best in most of the datasets, and especially in lower resolution. In fine-grained datasets, PAC-FNO shows good performance in all cases. In other words, PAC-FNO works very well for low-resolution image classification.

Table 18: Relative accuracy on low-resolution images generated from ImageNet-1k

| Model         | Method    | Resolution  |             |             |             |             |             |         |
|---------------|-----------|-------------|-------------|-------------|-------------|-------------|-------------|---------|
|               |           | 28          | 32          | 56          | 64          | 112         | 128         | 224 299 |
| ResNet-18     | Resize    | 23.9        | 31.7        | 65.5        | 72.3        | 91.3        | 93.8        | 100 -   |
|               | Fine-tune | 1.6         | 3.3         | 15.7        | 25.1        | 53.1        | 77.8        | 100 -   |
|               | DRLN      | 0.3         | -           | 24.5        | -           | 90.0        | -           | 100 -   |
|               | DRPN      | 45.3        | -           | 79.7        | -           | 96.7        | -           | 100 -   |
|               | FNO       | 57.3        | 64.5        | 84.3        | 87.7        | 96.4        | 97.7        | 100 -   |
|               | UNO       | 57.5        | 65.3        | 84.9        | 88.3        | 96.7        | 98.1        | 100 -   |
|               | A-FNO     | <b>63.2</b> | <b>72.3</b> | <b>87.9</b> | <b>91.2</b> | <b>97.7</b> | <b>98.5</b> | 100 -   |
|               | PAC-FNO   | 60.8        | 67.9        | 86.2        | 89.5        | 97.3        | 98.4        | 100 -   |
|               |           |             |             |             |             |             |             |         |
| Inception-V3  | Resize    | 21.6        | 28.5        | 62.9        | 69.7        | 89.9        | 92.9        | - 100   |
|               | Fine-tune | 51.1        | 60.9        | 82.2        | 90.1        | 94.1        | 94.6        | - 100   |
|               | FNO       | 62.4        | 68.9        | 87.4        | 89.5        | 95.5        | 97.6        | - 100   |
|               | UNO       | 54.6        | 62.2        | 84.6        | 88.0        | 96.6        | 97.7        | - 100   |
|               | A-FNO     | 44.6        | 52.9        | 79.6        | 83.7        | 94.8        | 96.3        | - 100   |
|               | PAC-FNO   | <b>62.9</b> | <b>70.0</b> | <b>87.8</b> | <b>90.2</b> | <b>97.1</b> | <b>98.1</b> | - 100   |
| ViT-B16       | Resize    | 51.3        | 58.4        | 81.4        | 85.0        | 94.7        | 96.3        | 100 -   |
|               | Fine-tune | 49.1        | 59.8        | 82.1        | 85.8        | 95.3        | 96.7        | 100 -   |
|               | DRLN      | 4.6         | -           | 51.8        | -           | 94.9        | -           | 100 -   |
|               | DRPN      | 64.4        | -           | 90.0        | -           | <b>98.6</b> | -           | 100 -   |
|               | FNO       | 49.1        | 58.5        | 83.1        | 86.8        | 96.7        | 97.9        | 100 -   |
|               | UNO       | 54.5        | 63.1        | 84.7        | 87.7        | 97.1        | 98.3        | 100 -   |
|               | A-FNO     | <b>69.1</b> | <b>74.8</b> | <b>90.9</b> | <b>93.2</b> | <b>98.5</b> | <b>99.2</b> | 100 -   |
|               | PAC-FNO   | 58.5        | 65.5        | 86.7        | 89.9        | 97.6        | 98.7        | 100 -   |
|               |           |             |             |             |             |             |             |         |
| ConvNeXt-Tiny | Resize    | 33.3        | 41.8        | 73.6        | 78.7        | 90.9        | 93.7        | 100 -   |
|               | Fine-tune | 49.1        | 76.2        | 80.4        | 92.9        | 93.4        | 98.7        | 100 -   |
|               | DRLN      | 0.4         | -           | 30.4        | -           | 87.0        | -           | 100 -   |
|               | DRPN      | 49.3        | -           | 82.7        | -           | 96.2        | -           | 100 -   |
|               | FNO       | 54.0        | 61.7        | 85.1        | 88.1        | 96.6        | 97.7        | 100 -   |
|               | UNO       | 72.7        | <b>78.0</b> | <b>91.4</b> | 93.7        | 98.1        | 98.9        | 100 -   |
| ConvNeXt-Tiny | A-FNO     | 61.8        | 68.5        | 87.2        | 90.3        | 97.2        | 98.1        | 100 -   |
|               | PAC-FNO   | <b>72.3</b> | <b>77.5</b> | <b>91.4</b> | <b>93.5</b> | <b>98.4</b> | <b>99.0</b> | 100 -   |

Table 19: Relative accuracy on low-resolution images generated from Fine-grained datasets

| Dataset          | Method    | Resolution  |             |             |             |             |             |     |
|------------------|-----------|-------------|-------------|-------------|-------------|-------------|-------------|-----|
|                  |           | 28          | 32          | 56          | 64          | 112         | 128         | 224 |
| Oxford-IIIT Pets | Resize    | 31.4        | 38.8        | 74.8        | 82.2        | 95.9        | 97.3        | 100 |
|                  | Fine-tune | 34.8        | 43.8        | 78.0        | 84.5        | 97.0        | 97.5        | 100 |
|                  | DRLN      | 3.6         | -           | 39.3        | -           | 94.0        | -           | 100 |
|                  | DRPN      | 44.3        | -           | 89.9        | -           | 98.8        | -           | 100 |
|                  | FNO       | 20.9        | 59.1        | 66.3        | 76.8        | 94.9        | 98.9        | 100 |
|                  | UNO       | 12.3        | 17.4        | 47.8        | 55.9        | 88.7        | 92.8        | 100 |
|                  | A-FNO     | 30.3        | 37.4        | 71.3        | 78.8        | 95.6        | 97.5        | 100 |
|                  | PAC-FNO   | <b>80.0</b> | <b>84.3</b> | <b>93.8</b> | <b>95.5</b> | <b>98.7</b> | <b>99.3</b> | 100 |
|                  |           |             |             |             |             |             |             |     |
| Flowers          | Resize    | 41.2        | 49.6        | 78.5        | 83.7        | 96.0        | 97.7        | 100 |
|                  | Fine-tune | 46.2        | 53.3        | 82.2        | 85.4        | 96.5        | 98.0        | 100 |
|                  | DRLN      | 10.3        | -           | 55.7        | -           | 95.2        | -           | 100 |
|                  | DRPN      | 67.3        | -           | <b>92.8</b> | -           | 99.1        | -           | 100 |
|                  | FNO       | 26.2        | 34.0        | 68.2        | 75.6        | 94.9        | 97.0        | 100 |
|                  | UNO       | 24.1        | 31.4        | 67.1        | 74.6        | 94.5        | 96.4        | 100 |
| FGVC Aircraft    | A-FNO     | 29.2        | 36.6        | 69.3        | 76.2        | 93.8        | 96.6        | 100 |
|                  | PAC-FNO   | <b>78.5</b> | <b>82.6</b> | <b>92.8</b> | <b>94.6</b> | <b>99.2</b> | <b>99.8</b> | 100 |
|                  |           |             |             |             |             |             |             |     |
|                  | Resize    | 3.1         | 3.5         | 34.3        | 52.4        | 89.1        | 93.2        | 100 |
|                  | Fine-tune | 10.7        | 20.3        | 50.4        | 73.1        | <b>96.7</b> | 95.2        | 100 |
|                  | DRLN      | 1.4         | -           | 16.4        | -           | 86.4        | -           | 100 |
|                  | DRPN      | 23.1        | -           | 74.8        | -           | 96.6        | -           | 100 |
|                  | FNO       | 32.6        | 41.1        | 73.6        | 79.3        | 92.4        | 93.8        | 100 |
|                  | UNO       | 2.0         | 2.1         | 11.2        | 27.8        | 89.5        | 93.6        | 100 |
| Food-101         | A-FNO     | 8.4         | 14.2        | 62.9        | 73.3        | 92.9        | 95.3        | 100 |
|                  | PAC-FNO   | <b>46.5</b> | <b>55.6</b> | <b>82.6</b> | <b>85.6</b> | <b>94.9</b> | <b>96.9</b> | 100 |
|                  |           |             |             |             |             |             |             |     |
|                  | Resize    | 44.0        | 52.8        | 83.6        | 88.0        | 96.7        | 97.9        | 100 |
|                  | Fine-tune | 55.0        | 59.3        | 88.0        | 89.9        | 96.8        | 98.2        | 100 |
|                  | DRLN      | 7.7         | -           | 42.9        | -           | 95.3        | -           | 100 |
|                  | DRPN      | 60.2        | -           | 89.6        | -           | 65.3        | -           | 100 |
|                  | FNO       | 48.0        | 56.5        | 85.8        | 89.2        | 97.1        | 98.0        | 100 |
|                  | UNO       | 57.5        | 64.5        | 85.9        | 89.1        | 96.9        | 97.8        | 100 |
| Food-101         | A-FNO     | 52.2        | 58.6        | 81.9        | 85.9        | 95.0        | 96.1        | 100 |
|                  | PAC-FNO   | <b>82.9</b> | <b>86.1</b> | <b>94.6</b> | <b>96.1</b> | <b>98.7</b> | <b>99.2</b> | 100 |

## F.6 ADDITIONAL NATURAL INPUT VARIATIONS

Table 20 shows the remaining input variation results of ImageNet-C/P Hendrycks & Dietterich (2019). For the remaining input variations, we report results at 32, 64, 128, and 224 resolution, excluding SR models whose performance appears to be meaningless. In most cases, PAC-FNO shows good performance at 32 and 64 resolution, and Fine-tune shows good performance at 128 $\times$ 128 and 224 $\times$ 224 resolution. However, at 128 and 224, there is a performance difference of up to 5% (Glass noise 44.2% vs. 39.5% at 128 $\times$ 128 resolution), but at 32 and 63, there is a performance difference of up to 47% (Pixelate 44.2% vs. 39.5% at 32 $\times$ 32 resolution). In other words, PAC-FNO shows good performance by a large margin at low-resolution.

Table 20: **Performance of PAC-FNO on the input variation tasks.** We show the top-1 accuracy of the ConvNext-Tiny model on remaining input variations, chosen from ImageNet-C/P (Hendrycks & Dietterich, 2019).

| Variation         | Model     | Resolution  |             |             |             |
|-------------------|-----------|-------------|-------------|-------------|-------------|
|                   |           | 32          | 64          | 128         | 224         |
| Gaussian Noise    | Resize    | 11.3        | 37.9        | 55.3        | 47.9        |
|                   | Fine-tune | 11.6        | 39.5        | <b>57.4</b> | 51.5        |
|                   | FNO       | 38.4        | 47.1        | 46.5        | 43.4        |
|                   | UNO       | 42.8        | 54.6        | 56.5        | 52.1        |
|                   | A-FNO     | 37.8        | 43.1        | 44.0        | 42.8        |
|                   | PAC-FNO   | <b>48.0</b> | <b>54.8</b> | 56.5        | <b>52.3</b> |
| Shot Noise        | Resize    | 11.3        | 37.3        | 53.8        | 45.4        |
|                   | Fine-tune | 11.6        | 39.0        | <b>56.2</b> | 49.5        |
|                   | FNO       | 38.2        | 45.9        | 43.9        | 41.1        |
|                   | UNO       | 41.2        | 53.6        | 55.2        | <b>50.5</b> |
|                   | A-FNO     | 38.1        | 42.9        | 42.8        | 41.2        |
|                   | PAC-FNO   | <b>47.7</b> | <b>54.0</b> | 55.0        | 50.0        |
| Impulse Noise     | Resize    | 10.8        | 36.9        | 53.2        | 44.6        |
|                   | Fine-tune | 11.3        | 38.5        | <b>55.5</b> | 48.5        |
|                   | FNO       | 37.2        | 45.2        | 41.8        | 38.5        |
|                   | UNO       | 37.2        | 53.5        | 54.3        | 48.9        |
|                   | A-FNO     | 36.5        | 41.3        | 39.3        | 37.2        |
|                   | PAC-FNO   | <b>46.7</b> | <b>53.5</b> | 54.1        | <b>50.2</b> |
| Defocus Noise     | Resize    | 10.0        | 32.2        | 48.3        | 43.2        |
|                   | Fine-tune | 11.1        | 36.9        | 56.9        | 55.9        |
|                   | FNO       | 35.8        | 44.9        | 47.4        | 47.6        |
|                   | UNO       | 47.2        | 51.5        | 50.5        | 47.3        |
|                   | A-FNO     | 38.6        | 47.2        | 47.4        | 47.2        |
|                   | PAC-FNO   | <b>51.3</b> | <b>57.7</b> | <b>57.5</b> | <b>56.2</b> |
| Glass Noise       | Resize    | 11.7        | 33.5        | 38.7        | 31.5        |
|                   | Fine-tune | 12.7        | 36.9        | <b>44.2</b> | <b>38.8</b> |
|                   | FNO       | 39.8        | 43.3        | 34.9        | 32.4        |
|                   | UNO       | 26.1        | 43.4        | 33.4        | 30.7        |
|                   | A-FNO     | 42.8        | 39.6        | 28.7        | 26.1        |
|                   | PAC-FNO   | <b>54.4</b> | <b>50.9</b> | 39.5        | 35.1        |
| Motion Noise      | Resize    | 10.6        | 36.5        | 54.0        | 48.1        |
|                   | Fine-tune | 11.5        | 39.6        | <b>58.8</b> | <b>55.9</b> |
|                   | FNO       | 36.3        | 46.9        | 48.7        | 47.4        |
|                   | UNO       | 41.3        | 50.6        | 49.3        | 47.9        |
|                   | A-FNO     | 37.6        | 44.9        | 42.6        | 41.3        |
|                   | PAC-FNO   | <b>50.4</b> | <b>56.5</b> | 55.3        | 54.1        |
| Zoom Noise        | Resize    | 10.3        | 25.7        | 43.0        | 43.6        |
|                   | Fine-tune | 10.9        | 26.8        | 46.4        | <b>48.9</b> |
|                   | FNO       | 35.2        | 38.5        | 37.3        | 37.0        |
|                   | UNO       | 33.5        | 40.2        | 39.4        | 39.5        |
|                   | A-FNO     | 36.0        | 35.9        | 33.8        | 33.5        |
|                   | PAC-FNO   | <b>49.6</b> | <b>48.8</b> | <b>46.5</b> | 44.6        |
| Snow              | Resize    | 4.9         | 20.2        | 46.6        | 49.6        |
|                   | Fine-tune | 5.2         | 21.8        | <b>49.0</b> | <b>52.5</b> |
|                   | FNO       | 20.3        | 31.1        | 41.6        | 45.9        |
|                   | UNO       | 40.1        | 36.5        | 44.0        | 43.6        |
|                   | A-FNO     | 18.1        | 27.4        | 37.5        | 40.4        |
|                   | PAC-FNO   | <b>31.9</b> | <b>41.1</b> | 48.3        | 49.4        |
| Frost             | Resize    | 6.5         | 30.8        | 54.9        | 54.1        |
|                   | Fine-tune | 6.9         | 32.3        | 56.7        | <b>57.0</b> |
|                   | FNO       | 27.8        | 42.3        | 49.0        | 50.9        |
|                   | UNO       | 46.0        | 48.8        | 54.0        | 53.6        |
|                   | A-FNO     | 22.6        | 37.7        | 45.3        | 46.0        |
|                   | PAC-FNO   | <b>40.3</b> | <b>52.4</b> | <b>56.9</b> | 56.9        |
| Contrast          | Resize    | 8.1         | 40.4        | 62.9        | 59.5        |
|                   | Fine-tune | 8.5         | 41.7        | <b>65.8</b> | <b>64.7</b> |
|                   | FNO       | 31.8        | 53.5        | 63.3        | 63.5        |
|                   | UNO       | 59.2        | 59.6        | 65.2        | 62.8        |
|                   | A-FNO     | 34.8        | 55.6        | 62.1        | 59.2        |
|                   | PAC-FNO   | <b>44.9</b> | <b>59.9</b> | 65.1        | 62.3        |
| Elastic Transform | Resize    | 12.2        | 40.0        | 56.8        | 53.2        |
|                   | Fine-tune | 12.6        | 41.5        | <b>59.1</b> | <b>56.6</b> |
|                   | FNO       | 38.3        | 49.7        | 52.1        | 51.5        |
|                   | UNO       | 45.4        | 52.8        | 50.5        | 48.4        |
|                   | A-FNO     | 41.3        | 48.2        | 47.8        | 45.4        |
|                   | PAC-FNO   | <b>51.8</b> | <b>57.3</b> | 55.8        | 53.5        |
| Pixelate          | Resize    | 14.5        | 81.0        | 63.8        | 53.2        |
|                   | Fine-tune | 15.1        | 52.9        | 66.8        | <b>56.6</b> |
|                   | FNO       | 48.6        | 66.7        | 62.5        | 42.9        |
|                   | UNO       | 40.8        | 70.9        | 64.6        | 52.2        |
|                   | A-FNO     | 53.2        | 67.8        | 58.9        | 40.8        |
|                   | PAC-FNO   | <b>62.6</b> | <b>73.2</b> | <b>67.9</b> | 54.4        |
| Jpeg Compression  | Resize    | 12.9        | 44.4        | 64.3        | 62.4        |
|                   | Fine-tune | 13.3        | 45.9        | 66.3        | 65.5        |
|                   | FNO       | 45.2        | 62.5        | <b>65.2</b> | <b>63.7</b> |
|                   | UNO       | <b>61.1</b> | 61.2        | 64.4        | 62.2        |
|                   | A-FNO     | 50.9        | <b>64.8</b> | 63.9        | 61.1        |
|                   | PAC-FNO   | 52.3        | 63.2        | 64.8        | 63.0        |
| Speckle Noise     | Resize    | 12.1        | 41.2        | 59.2        | 53.5        |
|                   | Fine-tune | 12.5        | 42.6        | <b>66.2</b> | 57.1        |
|                   | FNO       | 41.6        | 52.7        | 51.3        | 48.8        |
|                   | UNO       | 48.3        | 58.6        | 59.9        | 56.2        |
|                   | A-FNO     | 42.7        | 49.6        | 49.8        | 48.3        |
|                   | PAC-FNO   | <b>52.1</b> | <b>60.3</b> | 61.4        | <b>57.8</b> |
| Gaussian Blur     | Resize    | 10.4        | 34.8        | 51.1        | 46.9        |
|                   | Fine-tune | 11.5        | 39.1        | 59.0        | 58.4        |
|                   | FNO       | 37.3        | 47.8        | 50.6        | 50.8        |
|                   | UNO       | 51.2        | 54.0        | 53.3        | 50.2        |
|                   | A-FNO     | 40.1        | 50.2        | 51.3        | 51.2        |
|                   | PAC-FNO   | <b>52.5</b> | <b>60.0</b> | <b>60.7</b> | <b>59.4</b> |

Table 21: **Performance of PAC-FNO according to low and high-frequency filter.** We report top-1 accuracy on low-resolution images generated from ImageNet-1k in ConvNeXt-Tiny.

| ImageNet-1k                | 32          | 64          | 128         | 224         |
|----------------------------|-------------|-------------|-------------|-------------|
| PAC-FNO (low pass filter)  | 53.5        | 71.4        | 78.7        | 79.0        |
| PAC-FNO (high pass filter) | 21.6        | 49.4        | 68.2        | 74.8        |
| PAC-FNO                    | <b>58.9</b> | <b>74.5</b> | <b>80.2</b> | <b>81.5</b> |

| ImageNet-C/P Fog           | 32          | 64          | 128         | 224         |
|----------------------------|-------------|-------------|-------------|-------------|
| PAC-FNO (low pass filter)  | 18.0        | 41.7        | 52.4        | 54.4        |
| PAC-FNO (high pass filter) | 5.92        | 23.0        | 43.2        | 50.2        |
| PAC-FNO                    | <b>25.4</b> | <b>48.2</b> | <b>60.1</b> | <b>62.8</b> |

## F.7 ADDITIONAL ABLATION STUDIES

We provide an analysis of the impact of low and high-frequency information on accuracy/generalization through ablation experiments. Table 21 shows that compared to PAC-FNO, using low-pass and high-pass filters results in lower accuracy and generalization. When using a high-pass filter, it is expected to show good performance in ImageNet-C/P Fog, but since the perfor-

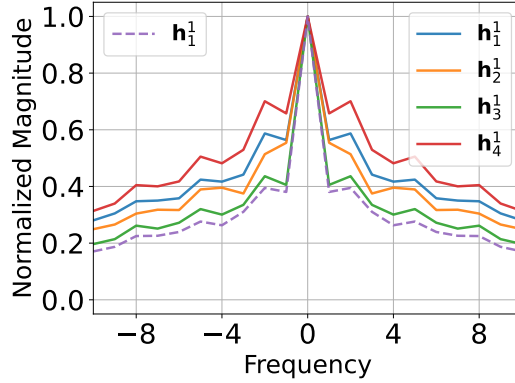

Figure 7: **Comparison of spectral responses according to the configuration of the AC-FNO block.** We test the ConvNeXT-Tiny backbone model on ImageNet-1k and visualize only the hidden vector of the first layer ( $m = 1$ ) for the hidden vectors  $\mathbf{h}_n^m$ . In the case of parallel (solid line), there are four hidden vectors ( $\mathbf{h}_n^1, n \in \{1, 2, 3, 4\}$ ), and in the case of serial (dashed line), there is one hidden vector ( $\mathbf{h}_n^1, n \in \{1\}$ ).

mance even on clean images is not good, it does not show good performance in terms of generalization. Therefore, only PAC-FNO, which uses both low and high-frequency components, shows good performance in terms of accuracy/generalization.

#### F.8 EFFECTIVENESS OF PARALLEL ARCHITECTURE

In this section, we show the efficacy of the parallel configuration of the AC-FNO block by visualizing which frequencies are captured. For fair comparison, we visualize the first layer output, which contains the most information of an original input sample, for the following two settings: AC-FNO in our proposed parallel configuration and AC-FNO in a serial configuration. Figure 7 shows spectral responses according to the configuration of the AC-FNO block. The farther it is from the center, the higher its frequency is.

In Figure 7, We show that in the parallel configuration, each hidden vector not only captures the low-frequency components but also captures the high-frequency components. Moreover, their frequencies are sometimes complementary to each other. In particular,  $\mathbf{h}_4^1$  has large normalized magnitudes at high frequency ranges, which means that  $\mathbf{h}_3^1$  captures high-frequency components well. On the other hand, the hidden vector of the serial configuration (dashed line) is concentrated at low-frequency (center).

Additionally, since the parallel configuration of the AC-FNO block captures both high and low-frequency components, it also shows good performance for image degradations as shown in Figure 8. Figures 8d and 8e are visualizations in the frequency domain. In other words, PAC-FNO consider high-frequency information well in those cases.

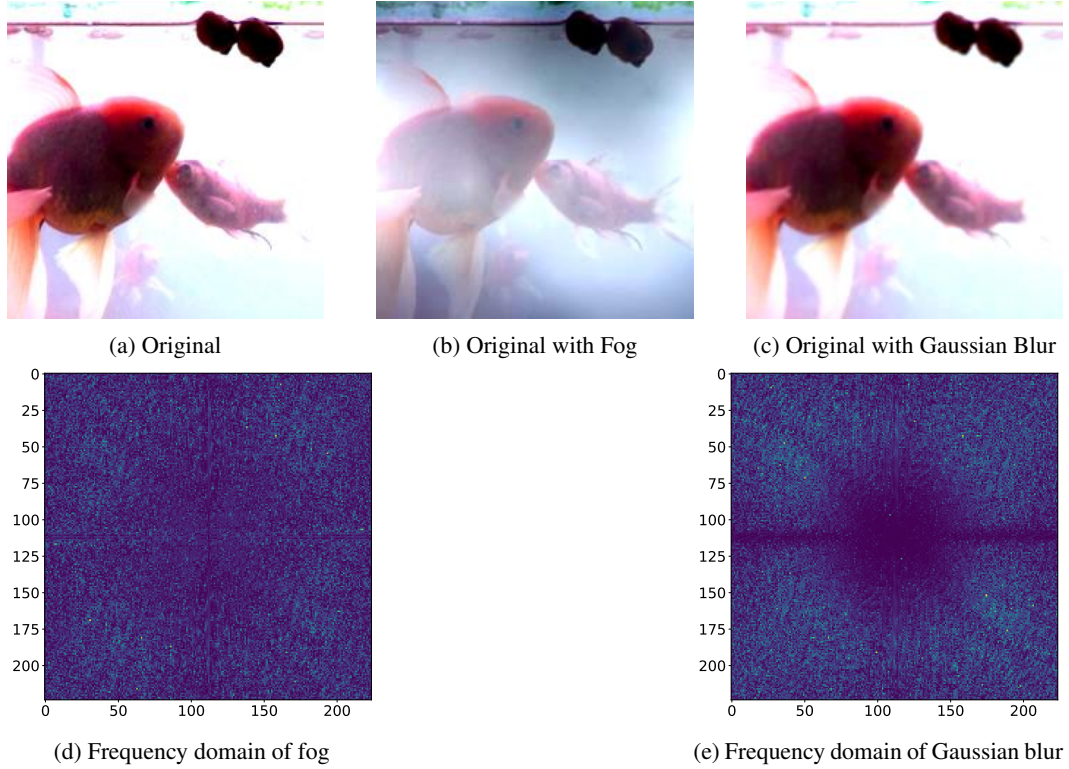

Figure 8: **Visualization of image degradation.** (d) and (e) are visualizations of degradation without clean images e.g., (b)-(a) and (c)-(a) in the frequency domain.

## F.9 FLOPS AND RUNTIME

We report the FLOPs and runtime on data at different resolutions

Table 22: Results of FLOPs and runtime on ImageNet-1k in ConvNeXt-Tine.

| ImageNet-1k   | Method    | Metrics      | Resolution |        |         |       |
|---------------|-----------|--------------|------------|--------|---------|-------|
|               |           |              | 28         | 56     | 112     | 224   |
| ConvNeXt-Tiny | Resize    | GFLOPs       | 8.96       | 8.96   | 8.96    | 8.96  |
|               |           | Runtimes (s) | 0.006      | 0.006  | 0.006   | 0.006 |
|               | Fine-tune | GFLOPs       | 8.96       | 8.96   | 8.96    | 8.96  |
|               |           | Runtimes (s) | 0.006      | 0.006  | 0.006   | 0.006 |
|               | DRLN      | GFLOPs       | 180.66     | 412.05 | 1200.50 | 8.96  |
|               |           | Runtimes (s) | 0.378      | 0.498  | 0.913   | 0.007 |
|               | DRPN      | GFLOPs       | 1220.42    | 576.94 | 387.88  | 8.96  |
|               |           | Runtimes (s) | 0.1532     | 0.164  | 0.171   | 0.007 |
|               | FNO       | GFLOPs       | 9.78       | 9.78   | 9.78    | 9.78  |
|               |           | Runtimes (s) | 0.016      | 0.016  | 0.016   | 0.016 |
|               | UNO       | GFLOPs       | 9.10       | 9.10   | 9.10    | 9.10  |
|               |           | Runtimes (s) | 0.018      | 0.018  | 0.018   | 0.018 |
|               | AFNO      | GFLOPs       | 8.96       | 8.96   | 8.96    | 8.96  |
|               |           | Runtimes (s) | 0.010      | 0.010  | 0.010   | 0.010 |
|               | PAC-FNO   | GFLOPs       | 8.98       | 8.98   | 8.98    | 8.98  |
|               |           | Runtimes (s) | 0.013      | 0.013  | 0.013   | 0.013 |
